# Supplementary material for: The Seasonal Dynamics of Organic and Inorganic Carbon along the Tropical Usumacinta River Basin (Mexico)
Source: MDPI journal article supplement (doi:10.3390/w14172703), 2022-08-30

## Supplementary information

**Table S1.** Sampling sites in the middle (M) and lower (B) basin of the Usumacinta River.

| Latitude<br>UTM | Longitude<br>UTM | Altitude<br>(m a.s.l) | River                   | Code | Strahler<br>order | Distance to the<br>mouth (km) |
|-----------------|------------------|-----------------------|-------------------------|------|-------------------|-------------------------------|
| 1782640         | 704727           | 158                   | Ixcán (+)               | M1   | 4                 | 721                           |
| 1781050         | 718609           | 150                   | Chajul (+)              | M2   | 3                 | 688                           |
| 1800790         | 727433           | 137                   | Lacantún (+)            | M3   | 5                 | 660                           |
| 1803793         | 726631           | 134                   | Tzendales (+)           | M4   | 3                 | 657                           |
| 1804437         | 727316           | 133                   | Lacantún-Tzendales (+)  | M5   | 5                 | 655                           |
| 1823051         | 761812           | 107                   | Chixoy                  | M6   | 4                 | 599                           |
| 1823953         | 762775           | 107                   | La Pasión (+)           | M7   | 4                 | 599                           |
| 1823414         | 760335           | 107                   | Chixoy-La Pasión        | M8   | 5                 | 596                           |
| 1861389         | 724442           | 95                    | Usumacinta (FC)         | M9   | 6                 | 525                           |
| 1926693         | 660039           | 25                    | Usumacinta (BC)         | M10  | 6                 | 385                           |
| 1964679         | 667707           | 5                     | San Pedro (+)           | B1   | 4                 | 290                           |
| 1963988         | 666942           | 6                     | Usumacinta (BA)         | B2   | 6                 | 290                           |
| 1964602         | 665786           | 5                     | Usumacinta-San Pedro    | B3   | 6                 | 288                           |
| 2023798         | 583080           | 2                     | San Pedro San Pablo (-) | B4   | -                 | 66                            |
| 2028076         | 548738           | 1                     | Usumacinta (TB)         | B5   | 6                 | 42                            |
| 2031951         | 535729           | 1                     | Grijalva (TB) (+)       | B6   | 6                 | 27                            |
| 2035408         | 537013           | 0                     | Grijalva-Usumacinta     | B7   | 7                 | 24                            |
| 2056374         | 557978           | 0                     | San Pedro San Pablo (-) | B8   | -                 | 7                             |

(+) tributaries, (-) distributary.

The distance to the mouth of the river was measured following the river channel.

FC: Frontera Corozal; BC: Boca del Cerro; BA: Balancán; TB: Tres Brazos.

**Table S2.** Summary of the physicochemical variables of the Usumacinta River in the rainy season. Average values are in the first line (grey) and standard deviation in the second line.

| River                    | Code | Q    | T    | DO   | pH   | K <sub>25</sub> | Turb | ORP | Chl-a | TSS |
|--------------------------|------|------|------|------|------|-----------------|------|-----|-------|-----|
| Ixcán                    | M1   | 274  | 20.8 | 8.6  | 8.1  | 319             | 102  | 328 | 1.1   | 108 |
|                          |      |      | <0.1 | <0.1 | <0.1 | <0.1            | 2    | 2   | 0.1   | 15  |
| Chajul                   | M2   | 141  | 21.3 | 8.4  | 8    | 241             | 100  | 333 | 0.3   | 113 |
|                          |      |      | <0.1 | <0.1 | 0.1  | <0.1            | 1    | 6   | <0.1  | 0.0 |
| Lacantún                 | M3   | 948  | 22.2 | 8.5  | 8.1  | 374             | 100  | 346 | 0.4   | 119 |
|                          |      |      | <0.1 | <0.1 | <0.1 | <0.1            | 4    | 16  | <0.1  | 14  |
| Tzendales                | M4   | 173  | 23.4 | 8.1  | 7.9  | 539             | 8    | 355 | 0.1   | 16  |
|                          |      |      | <0.1 | <0.1 | <0.1 | <0.1            | <1   | 1   | <0.1  | <1  |
| Lacantún-Tzendales       | M5   | 1121 | 22.4 | 8.4  | 8.1  | 383             | 100  | 360 | 0.3   | 100 |
|                          |      |      | <0.1 | <0.1 | <0.1 | 5               | 5    | 2   | <0.1  | 24  |
| Chixoy                   | M6   | 2625 | 24.2 | 6.4  | 7.7  | 288             | 70   | 346 | 1.8   | 96  |
|                          |      |      | <0.1 | 0.1  | <0.1 | 3               | 4    | 3   | <0.1  | 3   |
| La Pasión                | M7   | 1065 | 25.9 | 1.6  | 7.3  | 319             | 5    | 374 | 1.3   | 9   |
|                          |      |      | <0.1 | 0.1  | 0.1  | 1               | 1    | 27  | <0.1  | <1  |
| Chixoy-La Pasión         | M8   | 3690 | 25.1 | 4    | 7.4  | 304             | 36   | 403 | 1.2   | 58  |
|                          |      |      | 0.2  | 0.6  | 0.1  | 11              | 11   | 27  | 0.1   | 15  |
| Usumacinta (FC)          | M9   | 5715 | 24.3 | 5.8  | 7.7  | 316             | 55   | 357 | 0.8   | 76  |
|                          |      |      | <0.1 | 0.1  | <0.1 | 5               | 1    | 9   | <0.1  | 6   |
| Usumacinta (BC)          | M10  | 5970 | 24.9 | 6.6  | 7.8  | 359             | 52   | 428 | 0.7   | 71  |
|                          |      |      | <0.1 | <0.1 | <0.1 | <0.1            | 2    | 4   | <0.1  | 2   |
| San Pedro                | B1   | 369  | 27.0 | 4.6  | 7.6  | 737             | 5    | 411 | 4.1   | 8   |
|                          |      |      | <0.1 | <0.1 | <0.1 | 5               | <1   | 2   | 0.3   | 1   |
| Usumacinta (BA)          | B2   | 5610 | 25.2 | 6.5  | 7.7  | 355             | 46   | 408 | 1.4   | 62  |
|                          |      |      | <0.1 | <0.1 | <0.1 | <0.1            | 2    | 3   | 0.1   | 8   |
| Usumacinta-San Pedro     | B3   | 5133 | 25.5 | 6.3  | 7.7  | 399             | 41   | 410 | 1.5   | 61  |
|                          |      |      | 0.2  | 0.2  | <0.1 | 44              | 6    | 4   | 0.2   | 9   |
| San Pedro-San Pablo      | B4   | 302  | 26.6 | 4.7  | 7.7  | 362             | 46   | 405 | 3.5   | 60  |
|                          |      |      | <0.1 | <0.1 | <0.1 | <0.1            | 3    | 1   | 0.1   | 4   |
| Usumacinta (TB)          | B5   | 2709 | 26.7 | 4.6  | 7.7  | 361             | 45   | 409 | 3.4   | 63  |
|                          |      |      | <0.1 | 0.1  | <0.1 | <0.1            | 11   | 2   | 0.1   | 7   |
| Grijalva (TB)            | B6   | 2618 | 27.9 | 1.4  | 7.3  | 337             | 54   | 381 | 3.3   | 82  |
|                          |      |      | <0.1 | 0.1  | 0.1  | 1               | 17   | 9   | 0.1   | 22  |
| Usumacinta-Grijalva (TB) | B7   | 5380 | 27.4 | 2.8  | 7.5  | 357             | 54   | 392 | 4.1   | 80  |
|                          |      |      | 0.4  | 1.1  | 0.1  | 12              | 19   | 10  | 0.1   | 14  |
| San Pedro-San Pablo      | B8   | 368  | 27.5 | 1.9  | 7.4  | 394             | 51   | 390 | 3.7   | 69  |
|                          |      |      | 0.1  | 0.2  | <0.1 | 14              | 23   | 4   | 0.2   | 20  |

Q: water discharge (m<sup>3</sup> s<sup>-1</sup>); T: temperature (°C); DO: dissolved oxygen concentration (mg L<sup>-1</sup>); K<sub>25</sub>: electrical conductivity standardized at 25 °C (µS cm<sup>-1</sup>); ORP: oxidoreduction potential (mV); Turb: turbidity (NTU); Chl-a: chlorophyll-a concentration (µg L<sup>-1</sup>); TSS: total suspended solids (mg L<sup>-1</sup>); FC: Frontera Corozal; BC: Boca del Cerro; BA: Balancán; TB: Tres Brazos.

**Table S3.** Summary of the physicochemical variables of the Usumacinta River in the dry season. Average values are in the first line (grey) and standard deviation in the second line.

| River                    | Code | Q    | T    | DO   | pH   | K <sub>25</sub> | Turb | ORP | Chl-a | TSS |
|--------------------------|------|------|------|------|------|-----------------|------|-----|-------|-----|
| Ixcán                    | M1   | 62   | 25.9 | 10.8 | 8.2  | 546             | 44   | 302 | 0.3   | 4   |
|                          |      |      | <0.1 | <0.1 | <0.1 | <0.1            | <1   | 2   | <0.1  | <1  |
| Chajul                   | M2   | 32   | 28.3 | 10.6 | 8.3  | 346             | 43   | 280 | 0.9   | 10  |
|                          |      |      | <0.1 | <0.1 | <0.1 | <0.1            | 1    | 1   | <0.1  | <1  |
| Lacantún                 | M3   | 224  | 26.9 | 9    | 8.0  | 593             | 44   | 274 | 0.4   | 6   |
|                          |      |      | 0.1  | 0.1  | <0.1 | 1               | 4    | 2   | <0.1  | <1  |
| Tzendales                | M4   | 15   | 27.2 | 9.6  | 7.7  | 920             | 44   | 266 | 0.3   | 3   |
|                          |      |      | 0    | 0    | 0    | 1               | 1    | 1   | <0.1  | 1   |
| Lacantún-Tzendales       | M5   | 239  | 27.5 | 9.4  | 8.0  | 619             | 44   | 302 | 0.5   | 5   |
|                          |      |      | 0.1  | <0.1 | <0.1 | 6.3             | 4    | 13  | <0.1  | <1  |
| Chixoy                   | M6   | 408  | 27.5 | 8.5  | 8.1  | 502             | 65   | 346 | 0.9   | 4   |
|                          |      |      | 0.1  | <0.1 | <0.1 | 1               | 3    | 17  | 0.4   | 4   |
| La Pasión                | M7   | 145  | 29.8 | 8.1  | 7.8  | 913             | 34   | 351 | 0.5   | 7   |
|                          |      |      | <0.1 | 0.1  | <0.1 | 0.5             | 2    | 5   | 0.2   | <1  |
| Chixoy-La Pasión         | M8   | 553  | 28.4 | 8.4  | 7.9  | 664             | 54   | 365 | 3.6   | 33  |
|                          |      |      | <0.1 | <0.1 | <0.1 | 6.0             | 5    | 4.0 | 0.1   | <1  |
| Usumacinta (FC)          | M9   | 917  | 27.4 | 8    | 8.0  | 661             | 49   | 339 | 3.7   | 25  |
|                          |      |      | 0    | 0    | 0    | 0               | 2    | 15  | 0.3   | 3   |
| Usumacinta (BC)          | M10  | 998  | 28.7 | 7.7  | 7.8  | 767             | 40   | 326 | 2.4   | 19  |
|                          |      |      | 0    | 0    | 0    | 2               | 2    | 3   | 0.1   | 1   |
| San Pedro                | B1   | 72   | 28.3 | 7.7  | 7.9  | 1279            | 51   | 317 | 1.4   | 27  |
|                          |      |      | 0    | 0    | 0    | 1               | <1   | 0   | 0.1   | 2   |
| Usumacinta (BA)          | B2   | 839  | 28.4 | 8.3  | 8.0  | 775             | 42   | 340 | 4.3   | 20  |
|                          |      |      | 0.1  | 0.1  | 0    | 0               | 2    | 17  | 0.1   | 4   |
| Usumacinta-San Pedro     | B3   | 1080 | 28.5 | 8.4  | 8.0  | 811             | 41   | 353 | 4.4   | 19  |
|                          |      |      | 0.1  | 0.1  | 0    | 19.9            | 3    | 25  | 0.2   | 2   |
| San Pedro-San Pablo      | B4   | 41   | 29.1 | 8.6  | 8.2  | 777             | 44   | 352 | 6.7   | 21  |
|                          |      |      | 0    | 0    | 0    | 0               | 1    | 2   | 0.1   | <1  |
| Usumacinta (TB)          | B5   | 677  | 28.9 | 6.3  | 7.9  | 1,326           | 34   | 314 | 6.0   | 9   |
|                          |      |      | 0.5  | 3    | 0.2  | 17612           | 1    | 17  | 0.3   | 1   |
| Grijalva (TB)            | B6   | 517  | 28.3 | 5.8  | 7.8  | 23071           | 36   | 286 | 5.0   | 10  |
|                          |      |      | 0.9  | 1.5  | 0.1  | 15815           | 3    | 26  | 0.3   | 2   |
| Usumacinta-Grijalva (TB) | B7   | 1048 | 28.1 | 5.8  | 7.8  | 28418           | 33   | 304 | 3.6   | 7   |
|                          |      |      | 1.0  | 1.6  | 0.1  | 16826           | 2    | 13  | 0.4   | 5   |
| San Pedro-San Pablo      | B8   | 146  | 28.0 | 6.7  | 7.9  | 37114           | 66   | 302 | 13.4  | 11  |
|                          |      |      | 0.9  | 1.2  | 0.1  | 17794           | 43   | 10  | 1.3   | 2   |

Q: water discharge (m<sup>3</sup> s<sup>-1</sup>); T: temperature (°C); DO: dissolved oxygen concentration (mg L<sup>-1</sup>); K<sub>25</sub>: electrical conductivity standardized at 25 °C (µS cm<sup>-1</sup>); ORP: oxidoreduction potential (mV); Turb: turbidity (NTU); Chl-a: chlorophyll-a concentration (µg L<sup>-1</sup>); TSS: total suspended solids (mg L<sup>-1</sup>); FC: Frontera Corozal; BC: Boca del Cerro; BA: Balancán; TB: Tres Brazos.

**Table S4.** Average values of C ratios (DOC/POC, POC/Chl-a, DIC/DOC) and percentages (DOC/TOC, POC/TSS) in the Usumacinta River during the rainy (RS) and the dry season (DS).

| Code           | DOC/POC |     | DOC/TOC (%) |      | POC/TSS (%) |      | POC/Chl-a |         | DIC/DOC |      |
|----------------|---------|-----|-------------|------|-------------|------|-----------|---------|---------|------|
|                | RS      | DS  | RS          | DS   | RS          | DS   | RS        | DS      | RS      | DS   |
| <b>M1</b>      | 0.6     | 2.5 | 38.8        | 71.6 | 1.6         | 8.7  | 1,617.3   | 1,056.6 | 21.5    | 30.6 |
| <b>M2</b>      | 0.7     | 7.0 | 39.8        | 87.4 | 1.8         | 2.1  | 7,305.4   | 242.1   | 17.1    | 10.9 |
| <b>M3</b>      | 0.4     | 3.6 | 29.0        | 78.1 | 3.2         | 8.0  | 9,144.5   | 941.6   | 22.2    | 24.3 |
| <b>M4</b>      | 1.1     | 3.4 | 52.2        | 77.1 | 8.0         | 9.4  | 10,362.8  | 1,022.4 | 33.9    | 35.1 |
| <b>M5</b>      | 0.9     | 3.6 | 46.1        | 78.1 | 2.3         | 5.3  | 7,381.8   | 569.2   | 15.8    | 32.7 |
| <b>M6</b>      | 2.1     | 1.9 | 68.7        | 65.2 | 1.3         | 2.4  | 712.6     | 1,029.0 | 8.6     | 13.1 |
| <b>M7</b>      | 10.6    | 4.1 | 91.4        | 80.5 | 4.9         | 5.1  | 341.5     | 746.0   | 6.6     | 32.1 |
| <b>M8</b>      | 3.6     | 2.1 | 78.4        | 67.8 | 1.8         | 2.4  | 884.6     | 218.3   | 7.7     | 21.8 |
| <b>M9</b>      | 2.6     | 2.1 | 72.1        | 67.2 | 1.4         | 3.5  | 1,372.8   | 238.1   | 10.2    | 15.8 |
| <b>M10</b>     | 3.1     | 2.4 | 75.7        | 70.3 | 1.4         | 3.3  | 1,309.2   | 250.8   | 10.4    | 26.0 |
| <b>B1</b>      | 11.1    | 4.3 | 91.7        | 81.3 | 8.0         | 2.8  | 158.2     | 550.9   | 4.2     | 11.5 |
| <b>B2</b>      | 2.8     | 1.7 | 72.8        | 63.2 | 1.8         | 4.7  | 803.9     | 216.8   | 10.0    | 24.1 |
| <b>B3</b>      | 3.9     | 2.2 | 78.9        | 68.8 | 1.3         | 4.4  | 556.0     | 190.5   | 9.6     | 21.4 |
| <b>B4</b>      | 2.7     | 1.6 | 72.8        | 62.1 | 2.3         | 5.5  | 400.2     | 177.9   | 8.3     | 18.4 |
| <b>B5</b>      | 2.0     | 2.1 | 67.0        | 67.3 | 2.6         | 8.8  | 479.0     | 131.6   | 9.1     | 21.3 |
| <b>B6</b>      | 2.2     | 3.4 | 68.4        | 77.0 | 2.9         | 6.3  | 729.7     | 119.9   | 5.5     | 15.7 |
| <b>B7</b>      | 1.8     | 3.1 | 64.8        | 75.6 | 3.2         | 7.1  | 623.1     | 144.8   | 6.2     | 19.3 |
| <b>B8</b>      | 3.1     | 2.0 | 75.5        | 66.3 | 3.2         | 13.4 | 599.2     | 108.0   | 4.4     | 11.1 |
| <b>Average</b> | 3.1     | 2.9 | 65.8        | 72.5 | 2.9         | 5.7  | 2,487.9   | 441.9   | 11.7    | 21.4 |
| <b>S.D.</b>    | 3.0     | 1.3 | 17.7        | 7.1  | 2.0         | 3.0  | 3,410.4   | 358.2   | 7.7     | 7.7  |
| <b>Minimum</b> | 0.4     | 1.6 | 29.0        | 62.1 | 1.3         | 2.1  | 158.2     | 108.0   | 4.2     | 10.9 |
| <b>Maximum</b> | 11.1    | 7.0 | 91.7        | 87.4 | 8.0         | 13.4 | 10,362.8  | 1,056.6 | 33.9    | 35.1 |

**Table S5.** C fluxes in the Usumacinta River during the rainy and dry seasons. Average values are in the first line (grey) and standard deviation in the second line.

| Code    | DOC<br>(t d <sup>-1</sup> ) |       | POC<br>(t d <sup>-1</sup> ) |      | TOC<br>(t d <sup>-1</sup> ) |       | DIC<br>(t d <sup>-1</sup> ) |         |
|---------|-----------------------------|-------|-----------------------------|------|-----------------------------|-------|-----------------------------|---------|
|         | RS                          | DS    | RS                          | DS   | RS                          | DS    | RS                          | DS      |
| M1      | 26.1                        | 4.7   | 41.2                        | 1.9  | 67.3                        | 6.5   | 560.4                       | 142.6   |
|         | 0.3                         | 0.1   | 8.9                         | 0.3  | 8.6                         | 0.4   | 5.4                         | 6.7     |
| M2      | 16.3                        | 4.0   | 24.7                        | 0.6  | 41.0                        | 4.5   | 279.2                       | 43.1    |
|         | 4.2                         | 1.4   | 7.7                         | 0.0  | 3.5                         | 1.3   | 1.3                         | 0.4     |
| M3      | 126.4                       | 25.1  | 309.3                       | 7.0  | 435.7                       | 32.1  | 2,804.7                     | 611.5   |
|         | 49.5                        | 1.9   | 59.5                        | 1.6  | 64.2                        | 1.4   | 81.1                        | 4.1     |
| M4      | 20.8                        | 1.3   | 19.0                        | 0.4  | 39.8                        | 1.7   | 703.8                       | 45.6    |
|         | 1.0                         | 0.2   | 0.8                         | 0.0  | 1.0                         | 0.2   | 2.6                         | 3.7     |
| M5      | 192.0                       | 19.8  | 224.4                       | 5.6  | 416.4                       | 25.4  | 3,041.2                     | 647.3   |
|         | 5.5                         | 2.3   | 70.5                        | 0.5  | 62.1                        | 1.2   | 563.8                       | 11.6    |
| M6      | 617.0                       | 64.1  | 288.3                       | 34.2 | 898.4                       | 98.3  | 5,301.6                     | 840.7   |
|         | 33.6                        | 7.6   | 58.1                        | 5.9  | 76.9                        | 5.8   | 350.1                       | 114.6   |
| M7      | 431.0                       | 18.8  | 40.6                        | 4.6  | 471.6                       | 23.4  | 2,864.8                     | 604.3   |
|         | 20.1                        | 2.6   | 5.0                         | 0.7  | 10.5                        | 1.6   | 227.0                       | 3.6     |
| M8      | 1184.8                      | 79.2  | 326.3                       | 37.5 | 1511.1                      | 116.7 | 9128.6                      | 1726.0  |
|         | 155.6                       | 11.2  | 28.6                        | 8.2  | 132.5                       | 7.5   | 301.1                       | 72.1    |
| M9      | 1373.2                      | 144.3 | 530.7                       | 70.3 | 1904.0                      | 214.6 | 13992.6                     | 2278.6  |
|         | 127.3                       | 40.3  | 73.5                        | 6.8  | 83.9                        | 39.8  | 458.9                       | 132.6   |
| M10     | 1549.0                      | 124.8 | 497.7                       | 52.8 | 2046.8                      | 177.7 | 16073.4                     | 3240.4  |
|         | 68.9                        | 27.9  | 27.8                        | 2.8  | 98.8                        | 18.6  | 143.0                       | 112.7   |
| B1      | 226.7                       | 20.4  | 20.5                        | 4.7  | 247.2                       | 25.1  | 954.2                       | 233.6   |
|         | 10.3                        | 2.5   | 1.2                         | 0.1  | 9.2                         | 2.4   | 13.9                        | 3.1     |
| B2      | 1461.8                      | 115.9 | 526.4                       | 67.4 | 2007.4                      | 183.3 | 14617.0                     | 2798.2  |
|         | 75.4                        | 5.9   | 203.6                       | 8.9  | 169.8                       | 16.3  | 460.4                       | 3.3     |
| B3      | 1412.1                      | 174.3 | 358.0                       | 79.0 | 1790.8                      | 253.3 | 13565.5                     | 3728.7  |
|         | 261.9                       | 38.1  | 74.9                        | 7.5  | 274.7                       | 27.9  | 60.7                        | 66.0    |
| B4      | 97.3                        | 6.8   | 36.4                        | 4.2  | 133.7                       | 11.0  | 803.4                       | 125.5   |
|         | 1.6                         | 0.4   | 0.4                         | 0.9  | 2.0                         | 0.5   | 0.0                         | 5.3     |
| B5      | 771.8                       | 94.6  | 380.0                       | 46.0 | 1,151.8                     | 140.6 | 6,988.9                     | 2,018.0 |
|         | 61.5                        | 17.3  | 125.7                       | 10.7 | 95.1                        | 7.9   | 60.6                        | 197.3   |
| B6      | 1183.5                      | 90.2  | 546.3                       | 26.9 | 1729.7                      | 117.1 | 6567.6                      | 1416.4  |
|         | 79.6                        | 13.0  | 98.8                        | 2.9  | 97.4                        | 13.2  | 241.2                       | 2.7     |
| B7      | 2198.8                      | 146.9 | 1192.9                      | 47.5 | 3391.8                      | 194.4 | 13557.9                     | 2830.2  |
|         | 323.6                       | 20.3  | 466.6                       | 8.3  | 788.8                       | 17.4  | 86.9                        | 204.6   |
| B8      | 219.7                       | 36.0  | 71.2                        | 18.3 | 290.9                       | 54.3  | 970.4                       | 398.5   |
|         | 27.7                        | 6.5   | 14.5                        | 2.1  | 15.9                        | 2.3   | 4.1                         | 19.6    |
| Average | 737.4                       | 65.1  | 304.2                       | 28.3 | 1043.6                      | 93.3  | 6265.3                      | 1318.3  |
| S.D.    | 689.7                       | 57.5  | 298.3                       | 26.9 | 967.5                       | 83.7  | 5745.6                      | 1220.6  |
| Minimum | 16.3                        | 1.3   | 19.0                        | 0.4  | 39.8                        | 1.7   | 279.2                       | 43.1    |
| Maximum | 2198.8                      | 174.3 | 1192.9                      | 79.0 | 3391.8                      | 253.3 | 16073.4                     | 3728.7  |

**Figure S1.** Discharge variation along the Usumacinta River during the rainy and dry seasons. The blue and orange lines represent the main channel in the RS and DS, respectively. The mainstem differs in both seasons from the tributaries.

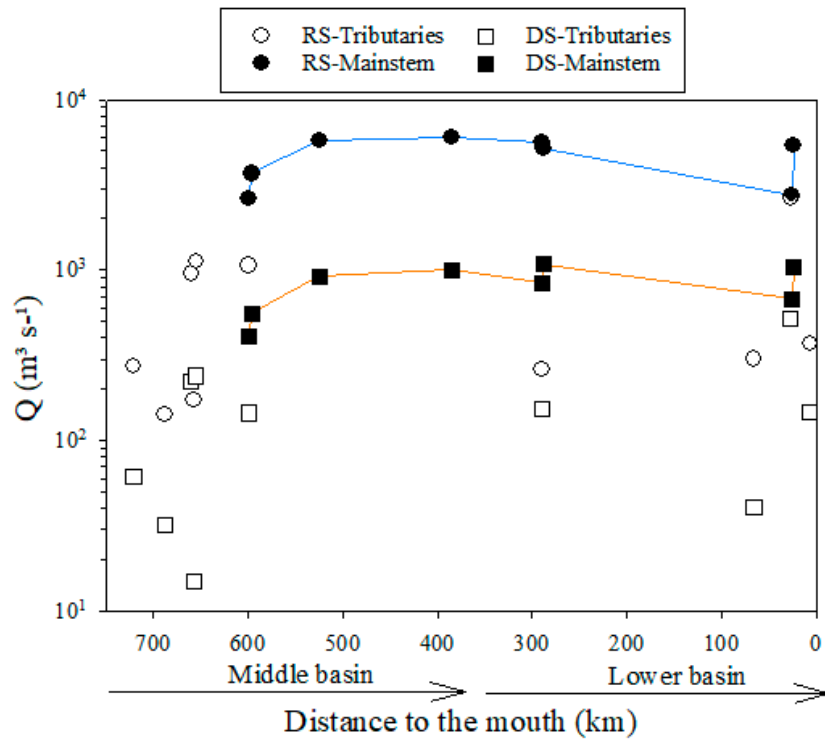

**Figure S2.** Chlorophyll-a concentrations ( $\pm$  S.D.) along the Usumacinta River during the rainy (RS) and dry (DS) seasons. The mainstem differs in both seasons from the tributaries.

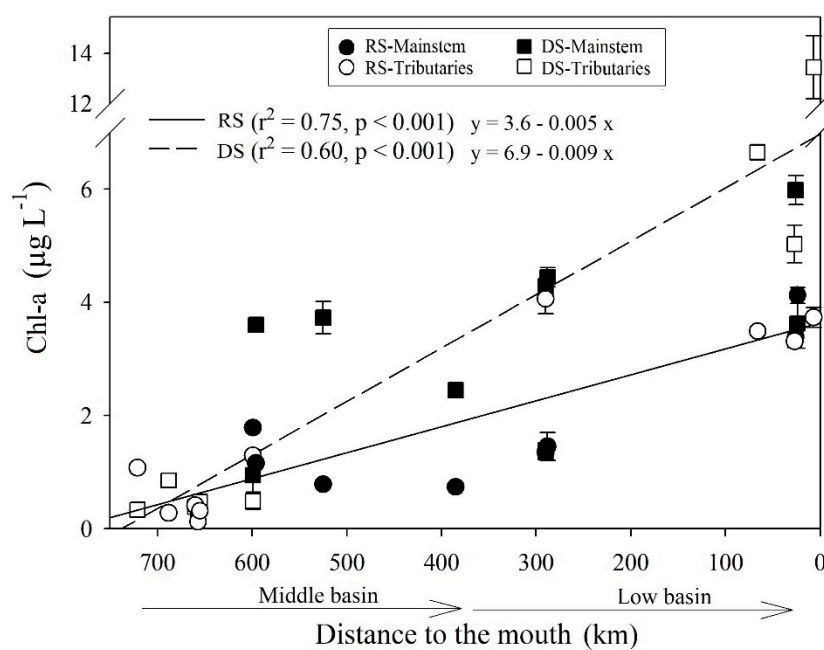

**Figure S3.** Adjustment of the percentage of POC (%) contained in the TSS concerning the TSS concentration of the Usumacinta River in the rainy (RS) and dry (DS) seasons. The mainstem differs in both seasons from the tributaries.

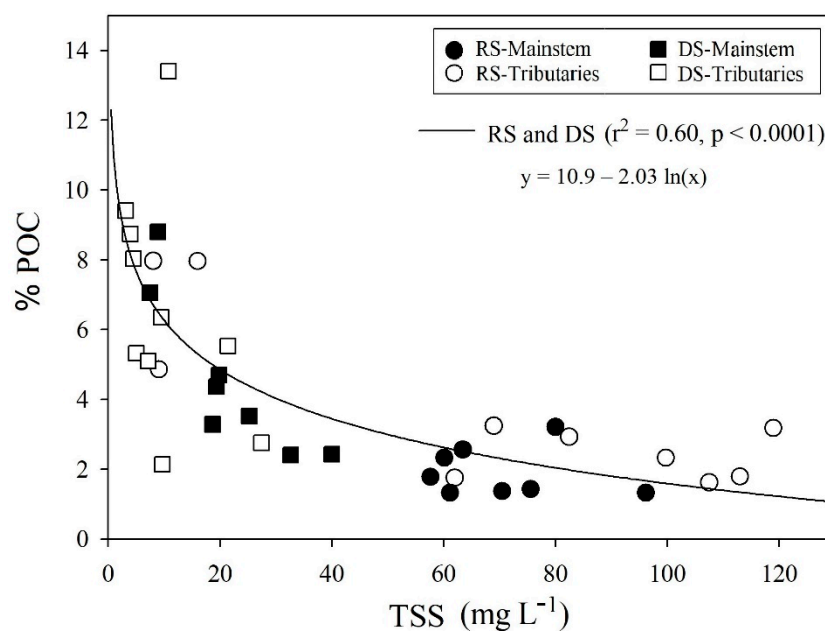



**Figure S4.** Longitudinal variation of the POC/Chl-a ratio with respect to distance from the mouth of the Usumacinta River during the rainy (RS) and dry (DS) seasons. The mainstem differs in both seasons from the tributaries.

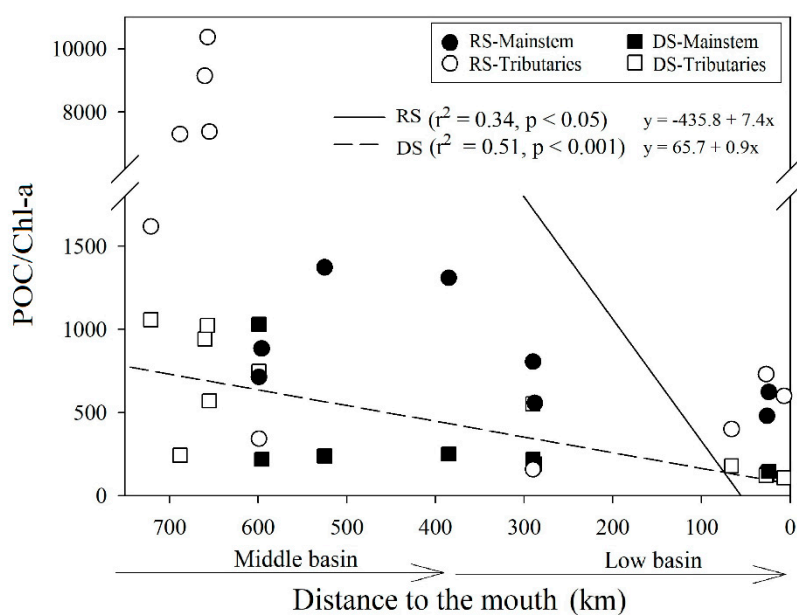

**Figure S5.** Longitudinal variation of the DIC/DOC ratio with respect to distance from the mouth of the Usumacinta River during the rainy (RS) and dry (DS) seasons. The mainstem differs in both seasons from the tributaries.

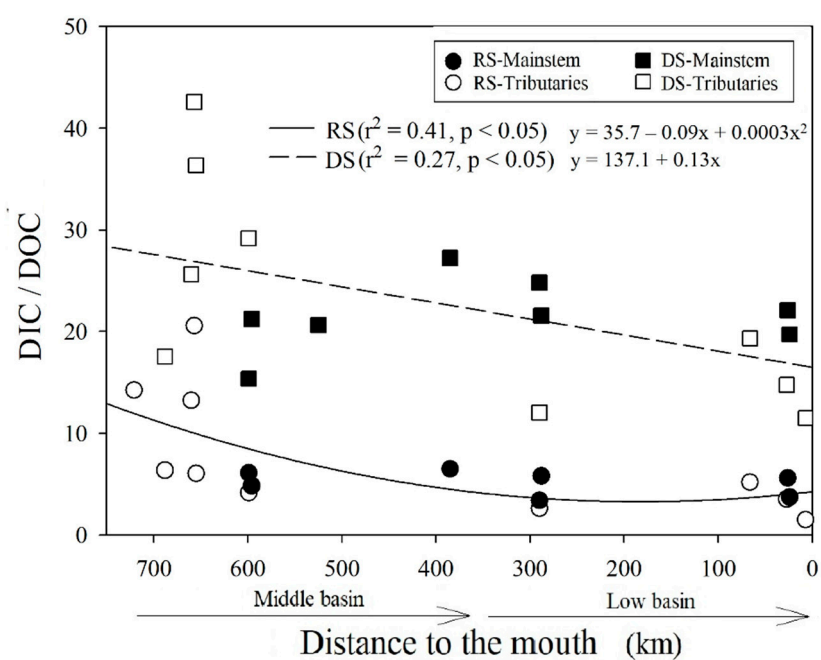

**Figure S6.** PIC adjustment regarding total suspended sediments concentration of the Usumacinta River in the rainy (RS) and dry (DS) seasons. The mainstem differs in both seasons from the tributaries.

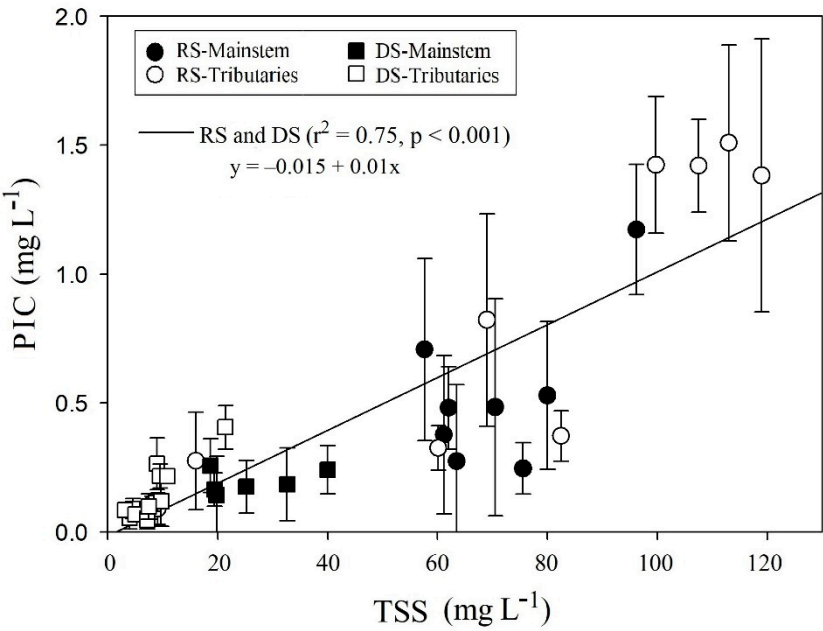

Supplement: s1 [file s1]
